# Supplementary material for: Single-walled carbon nanotube coated antibacterial paper: preparation and mechanistic study
Source: Royal Society of Chemistry journal article supplement (doi:10.1039/c3tb20188k), 2013-01-01
Supplement: c3tb20188k.pdf [file c3tb20188k.pdf]

## Supplementary Information

### Single-walled carbon nanotubes coated antibacterial paper: Preparation and mechanistic study

Archana R. Deokar,<sup>a</sup> Lih-Yuan Lin,<sup>b</sup> Chun-Chao Chang<sup>cd</sup> and Yong-Chien Ling<sup>\*a</sup>

<sup>a</sup>*Department of Chemistry, National Tsing Hua University, Hsinchu 30013, Taiwan.*

<sup>b</sup>*Department of Life Science, National Tsing Hua University, Hsinchu 30013, Taiwan.*

<sup>c</sup>*Department of Internal Medicine, School of Medicine, College of Medicine, Taipei Medical University, Taipei 11031, Taiwan.*

<sup>d</sup>*Division of Gastroenterology and Hepatology, Department of Internal Medicine, Taipei Medical University Hospital, Taipei 11031, Taiwan.*

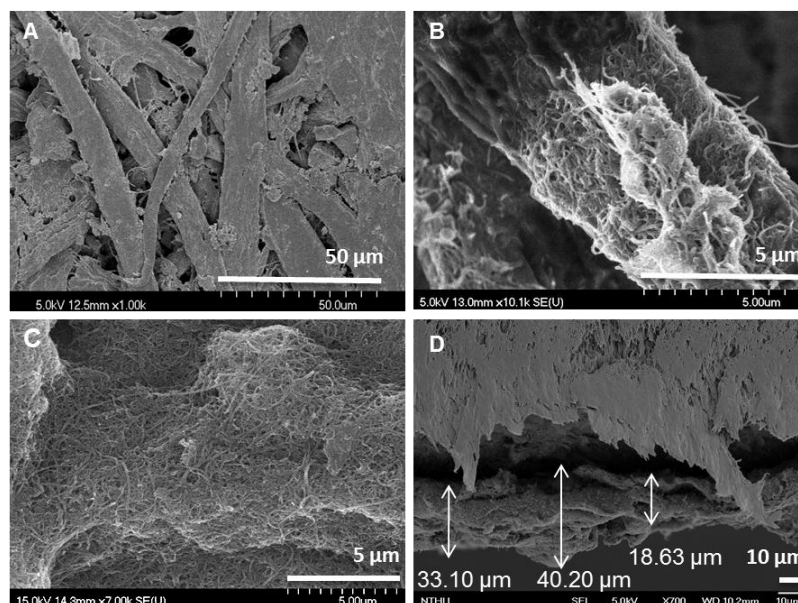

**Fig. S1** SEM images of (A) UP, SP with (B) 10 min, and (C) 20 min sonication, and (D) cross-sectional view of SP with 10 min sonication.

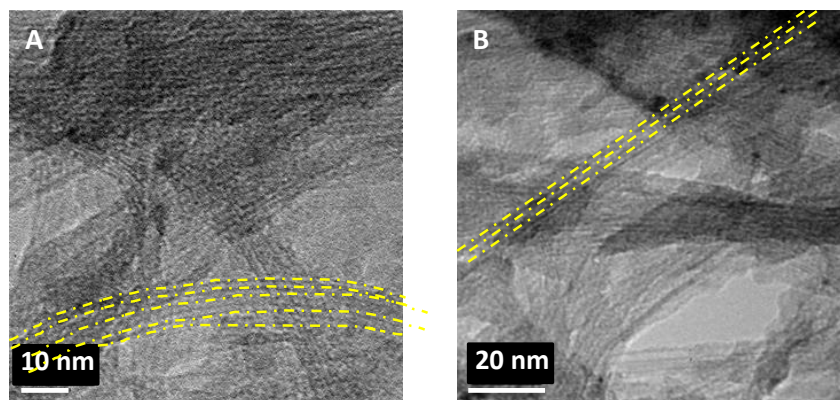

**Fig. S2** TEM images (A, B) of AFSWCNTs.

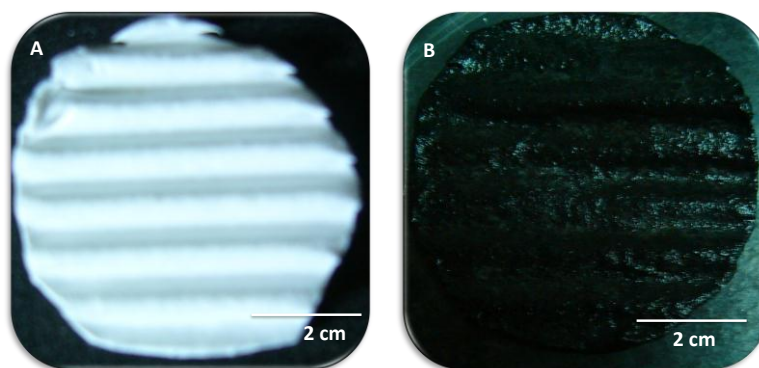

**Fig. S3** Optical images of (A) UP and (B) SP with 20 min of sonication

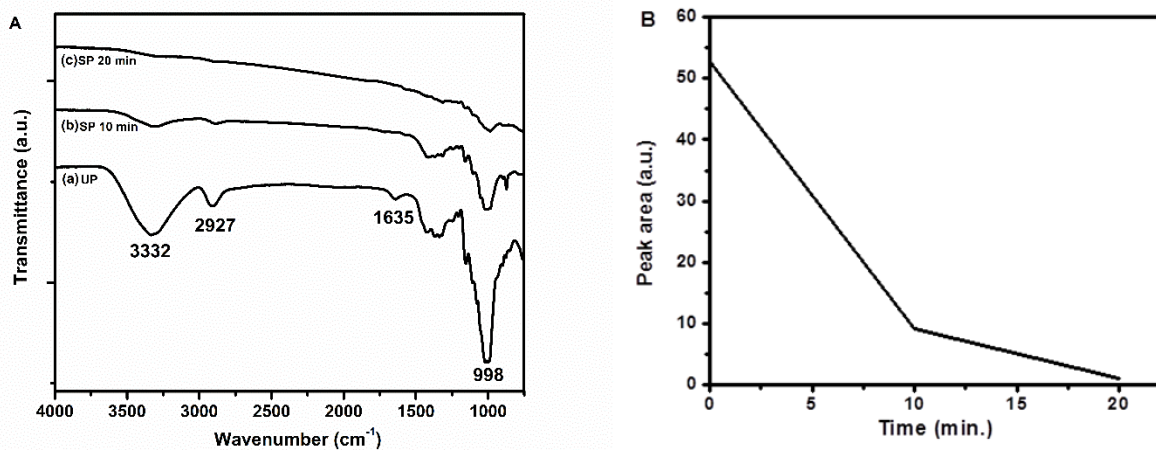

**Fig. S4** ATR-FTIR spectra of (A) UP and SP with different sonication time, (B) Peak area of 3100 - 3700 cm<sup>-1</sup> broad band as a function of sonication time.

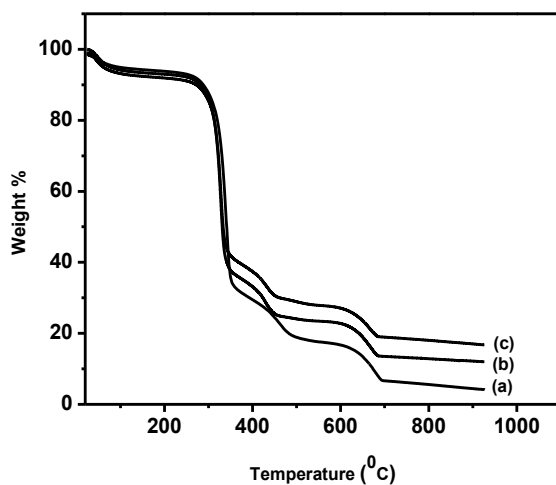

**Fig. S5** TGA thermograms of (a) UP, SP with (b) 10 min and (c) 20 min sonication.

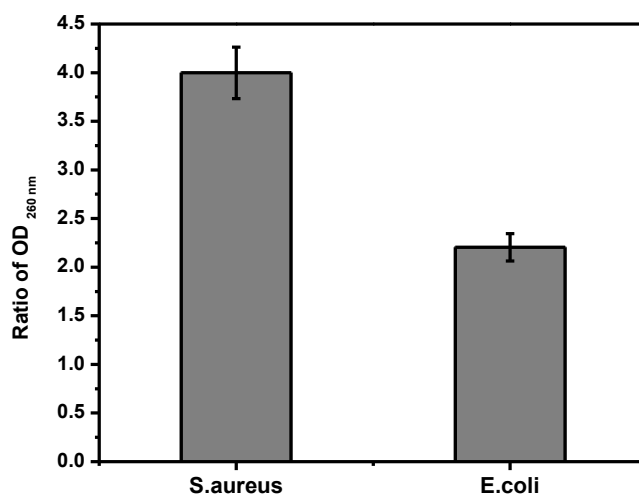

**Fig. S6** Ratio of OD<sub>260</sub> in SP Vs UP bacterial suspension after 1 h interaction.

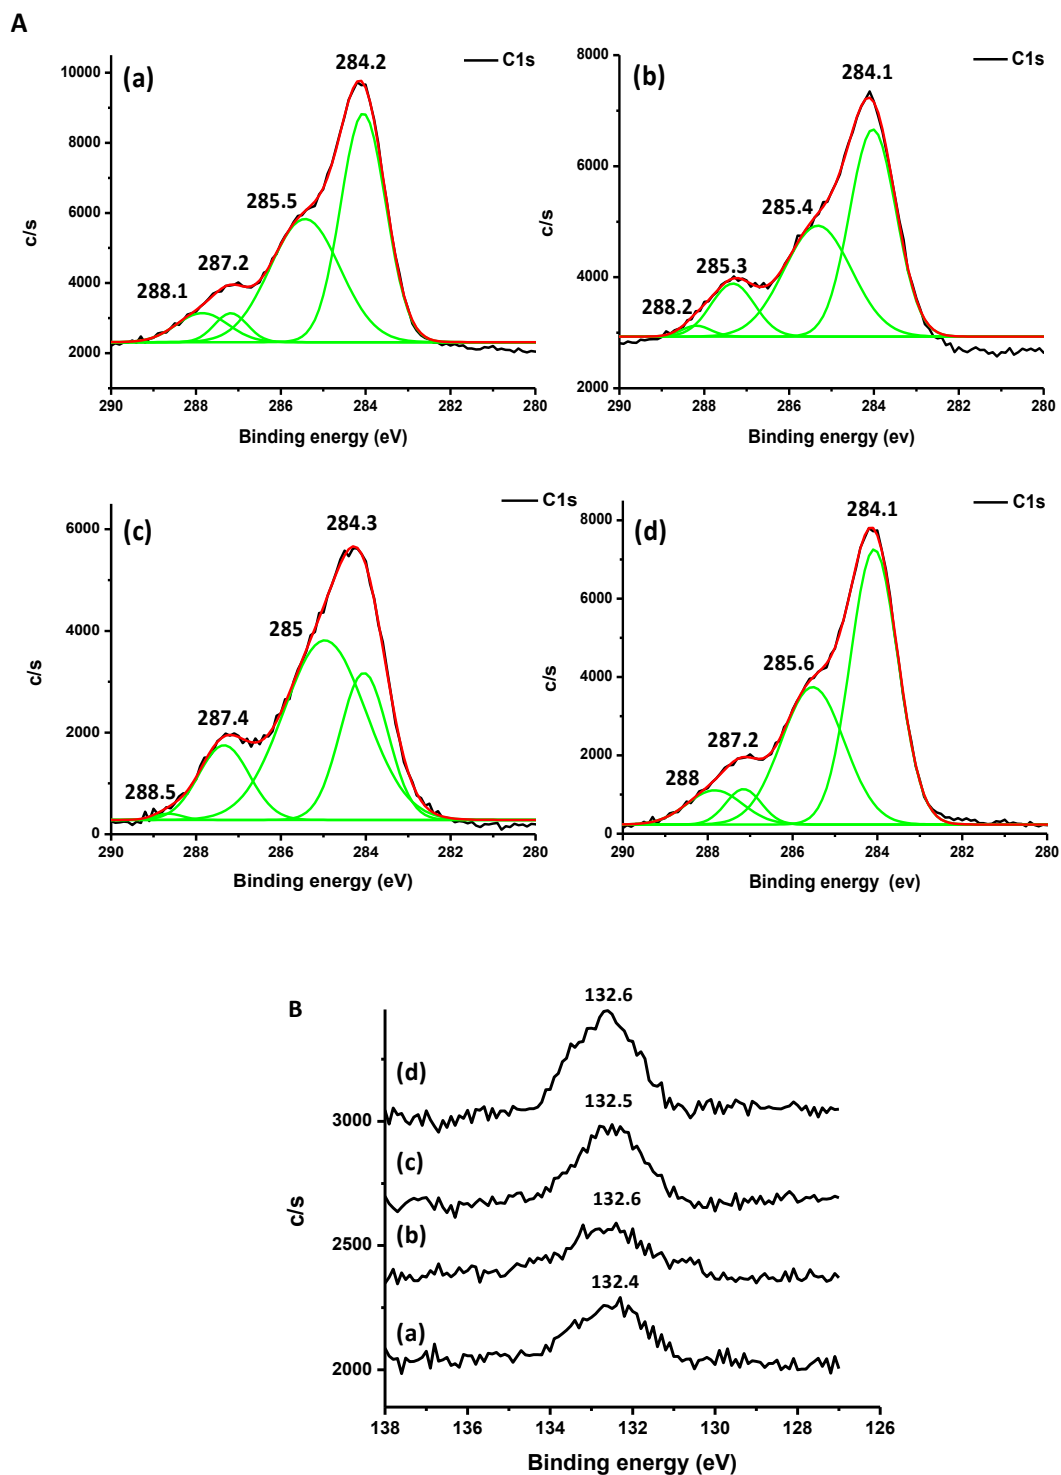

**Fig. S7** (A) C1s XPS spectra of freeze-dried *S. aureus* and *E. coli* for control group (a, c) and experimental group (b, d), respectively. (B) P2p spectral line of *S. aureus* and *E. coli* for control (a, c) and experimental group (b, d), respectively.

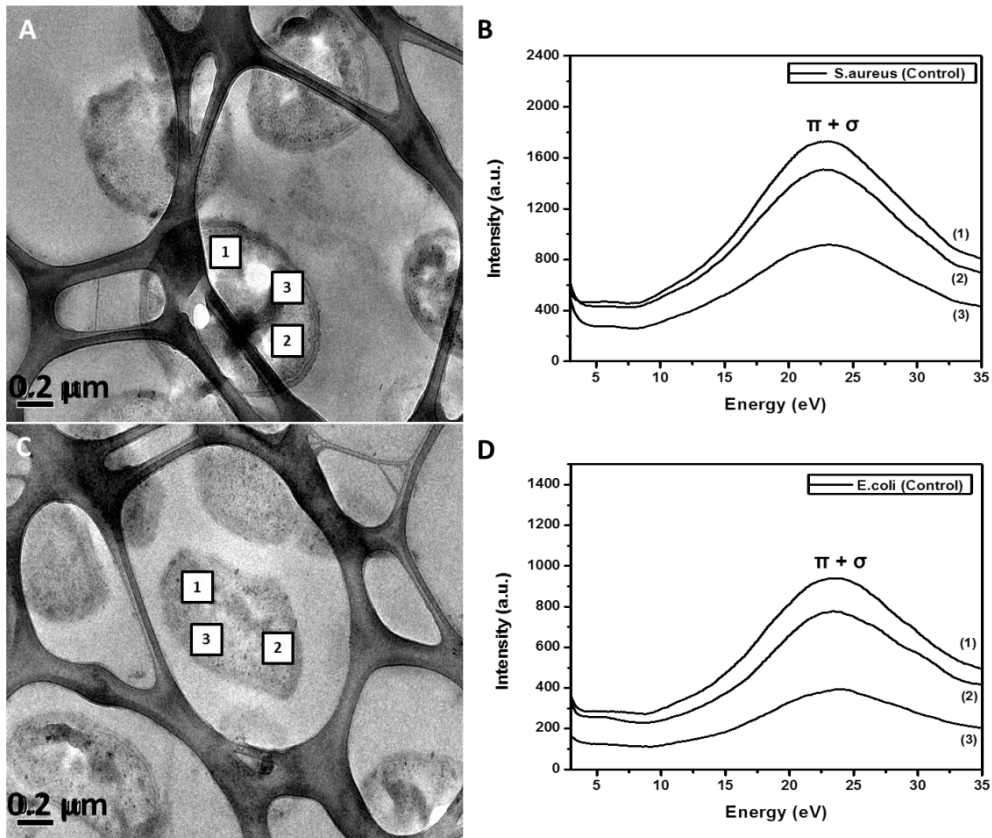

**Fig. S8** HAADF-STEM images of (A) *S. aureus* and (C) *E. coli* thin sections. The numbers in (A) and (C) indicates the area analyzed by EELS. Characteristic peak at ~23 eV in (B) and (D) EELS spectra corresponds to  $\pi + \sigma$  plasmon contributed by carbon-rich organelles in *S. aureus* and *E. coli* bacteria, respectively.

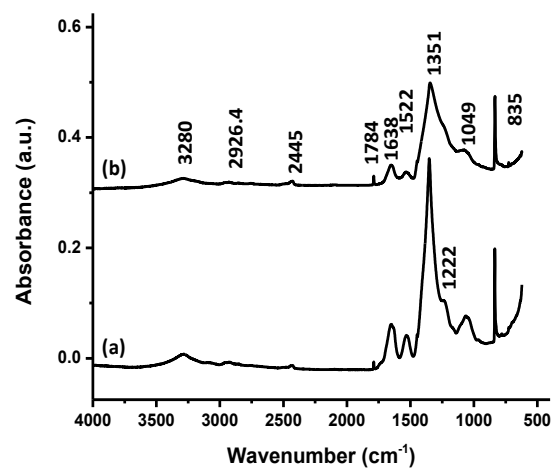

**Fig. S9** ATR-FTIR spectra of freeze-dried (a) *S. aureus* and (b) *E. coli* bacteria.

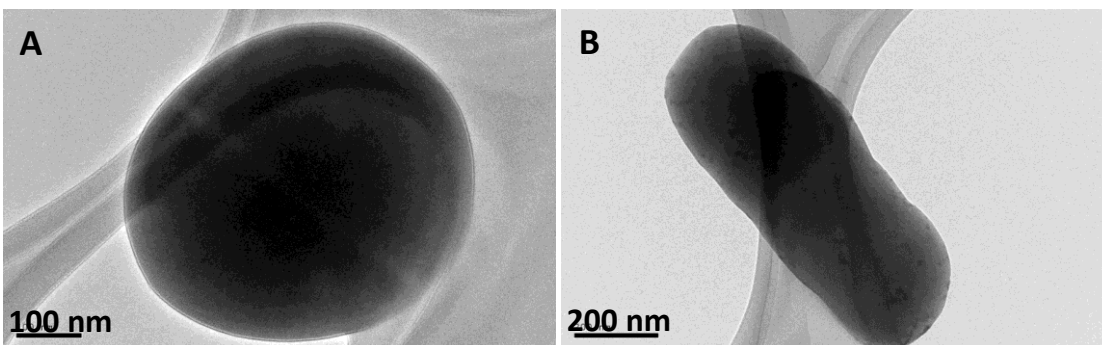

**Fig. S10** TEM images of intact (A) gram-positive *S. aureus* and (B) gram-negative *E. coli* bacteria.

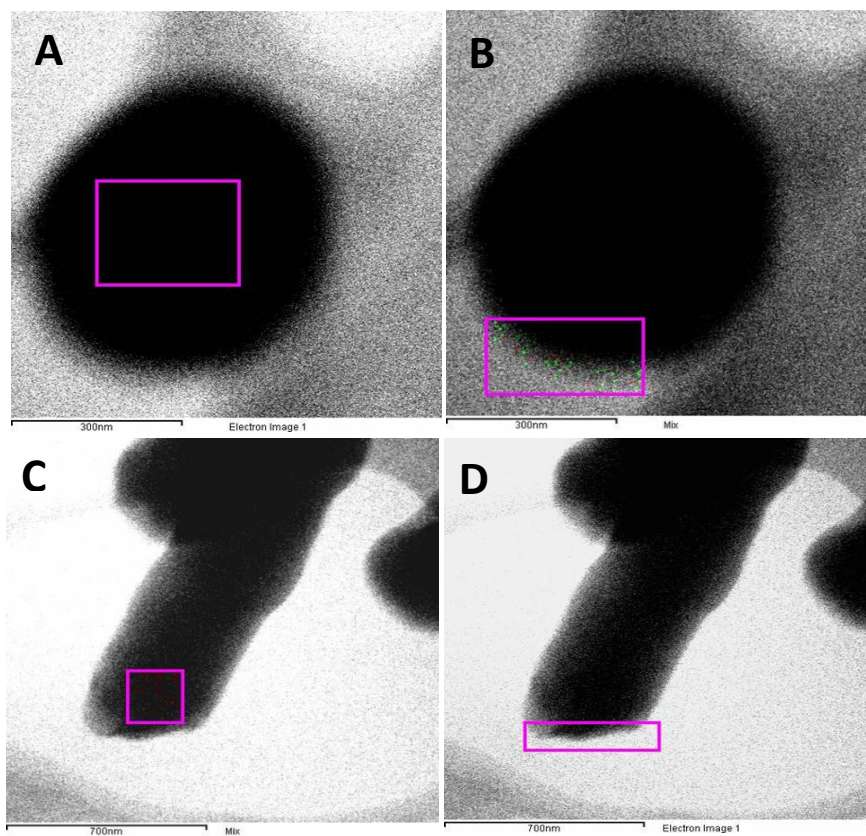

**Fig. S11** HAADF-STEM images of intact gram-positive *S. aureus* (A, B) and gram-negative *E. coli* (C, D) bacteria. Selected areas (highlighted with pink boxes) were investigated with EDAX to estimate the ratio of C and P elements at interior to the cell wall for both strains.

**Table S1** Ratio of C and P elements at interior to the cell wall for both gram-positive *S. aureus* (A, B) and gram-negative *E. coli* (C, D) bacteria.

| Bacteria         | Element                                | Ratio of C and P at interior to cell wall of bacteria |
|------------------|----------------------------------------|-------------------------------------------------------|
| <i>S. aureus</i> | P <sub>IN</sub> :P <sub>CW</sub> (A:B) | 1 : 3.7                                               |
| <i>E. coli</i>   | P <sub>IN</sub> :P <sub>CW</sub> (C:D) | 1 : 5                                                 |
| <i>S. aureus</i> | C <sub>IN</sub> :C <sub>cw</sub> (A:B) | 1 : 1.02                                              |
| <i>E. coli</i>   | C <sub>IN</sub> :C <sub>cw</sub> (C:D) | 1 : 1.14                                              |

**Table S2** Antibacterial contribution by gram-positive *S. aureus* and gram-negative *E. coli*.

| Survival Rate (%) |    |    | Normalized survival rate* (%) | Antibacterial efficacy *(%) |
|-------------------|----|----|-------------------------------|-----------------------------|
|                   | SP | UP |                               |                             |
| <i>S. aureus</i>  | 12 | 88 | 14                            | 86                          |
| <i>E. coli</i>    | 46 | 94 | 48                            | 52                          |

\* The viable bacteria were monitored by counting the number of colony-forming units (CFU);

N= Survival rate of SP; N<sub>o</sub>= Survival rate of UP; Normalized survival rate= N/N<sub>o</sub> x 100% ;

Antibacterial efficacy = 100% – Normalized survival rate.
